# Supplementary material for: Visible Light Reductive Photocatalysis of Azo-Dyes with n–n Junctions Based on Chemically Deposited CdS
Source: MDPI journal article supplement (doi:10.3390/molecules27092924), 2022-05-04
Supplement: s1 [file s1]

# Visible Light Reductive Photocatalysis of Azo-Dyes with n–n Junctions Based on Chemically Deposited CdS

Michele Mazzanti, Martina Milani, Vito Cristino, Rita Boaretto, Alessandra Molinari \* and Stefano Caramori \*

Dipartimento di Scienze Chimiche, Farmaceutiche ed Agrarie, Università di Ferrara, Via Luigi Borsari 46, 44121 Ferrara, Italy; michele.mazzanti@unife.it (M.M.); martina.milani@unife.it (M.M.); vito.cristino@unife.it (V.C.); rita.boaretto@unife.it (R.B.)

\* Correspondence: alessandra.molinari@unife.it (A.M.); stefano.caramori@unife.it (S.C.)

## Table of Contents

Figure S1. Profilometry

Figure S2. AFM 3D map, top view and size analysis of FTO/ZrO<sub>2</sub>/CdS and FTO/TiO<sub>2</sub>/CdS

Figure S3. XRD patterns of FTO/CdS, FTO/ZrO<sub>2</sub>/CdS and FTO/TiO<sub>2</sub>/CdS

Figure S4. Tauc Plots of FTO/ZrO<sub>2</sub> /CdS and FTO/TiO<sub>2</sub>/CdS

Figure S5. Emission spectrum of FTO/CdS, FTO/ZrO<sub>2</sub>/CdS and FTO/TiO<sub>2</sub>/CdS

Figure S6. Emission decays of FTO/ZrO<sub>2</sub>/CdS

Figure S7. Emission decays of FTO/TiO<sub>2</sub>/CdS

Figure S8. Dark Cyclic voltammetry of the FTO/CdS

Figure S9. Dark Cyclic voltammetry of the FTO/TiO<sub>2</sub>/CdS

Figure S10. Dark Cyclic voltammetry of the FTO/ZrO<sub>2</sub>/CdS

Figure S11. Open circuit chronopotentiometry

Figure S12. Cyclic voltammetry of MO, AO7 and EDS

Figure S13. ESI-MS spectra of MO and EDS after irradiation with FTO/TiO<sub>2</sub>/CdS

Figure S14. C/C<sub>0</sub> vs irradiation time of azo-dyes with FTO/ZrO<sub>2</sub>/CdS and ESI-MS spectrum of EDS after irradiation

Table S1. Kinetic constant and half time values determined by dyes concentration decrease under visible light irradiation with FTO/MO<sub>2</sub>/CdS systems.

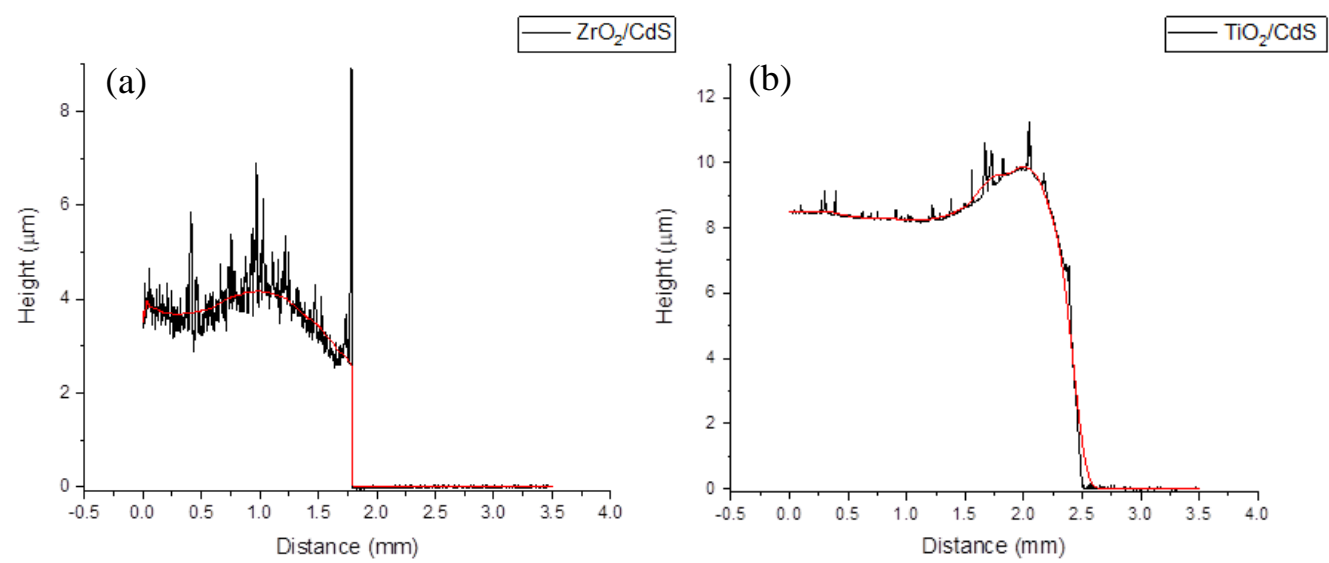

**Figure S1.** Thickness measurements of (a)  $\text{FTO}/\text{ZrO}_2/\text{CdS}$  and (b)  $\text{FTO}/\text{TiO}_2/\text{CdS}$

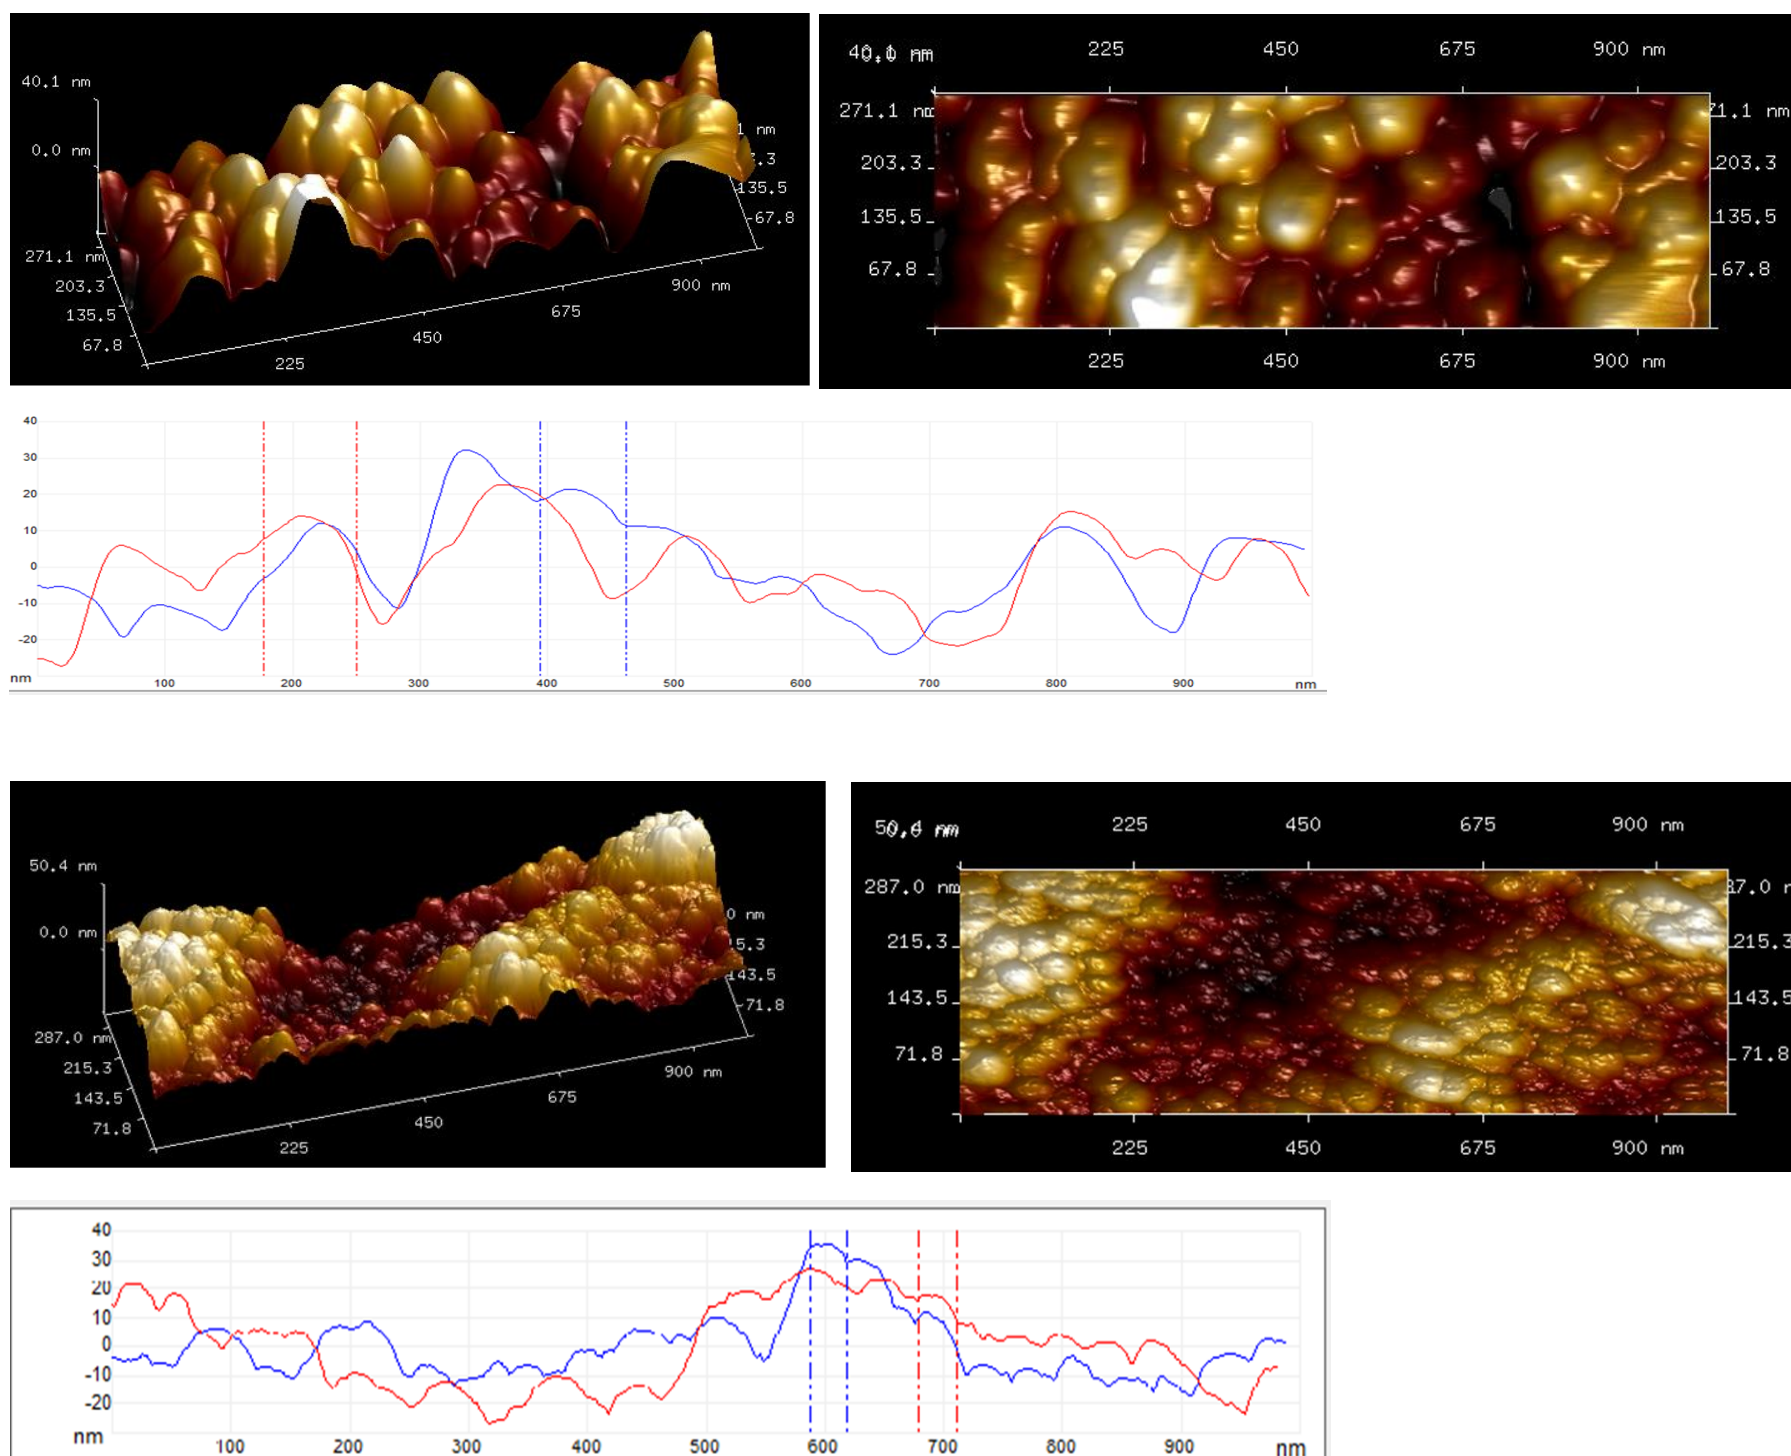

**Figure S2.** AFM 3D map, top view and cross sectional size analysis of (a) FTO/TiO<sub>2</sub>/CdS and (b) FTO/ZrO<sub>2</sub>/CdS

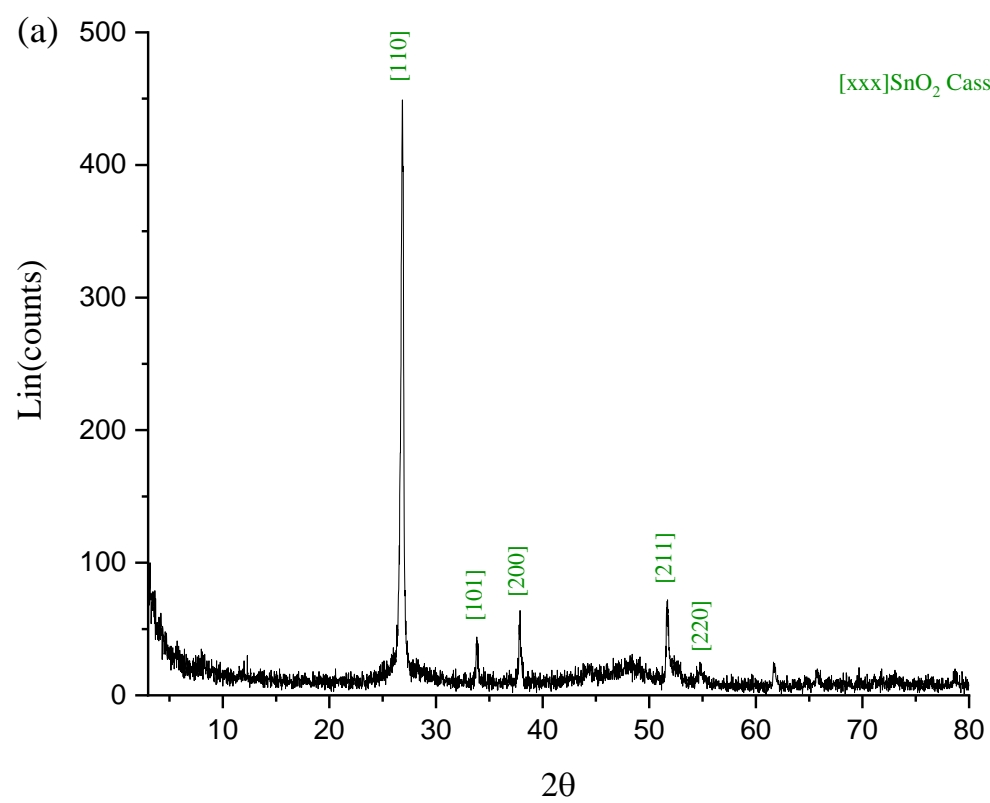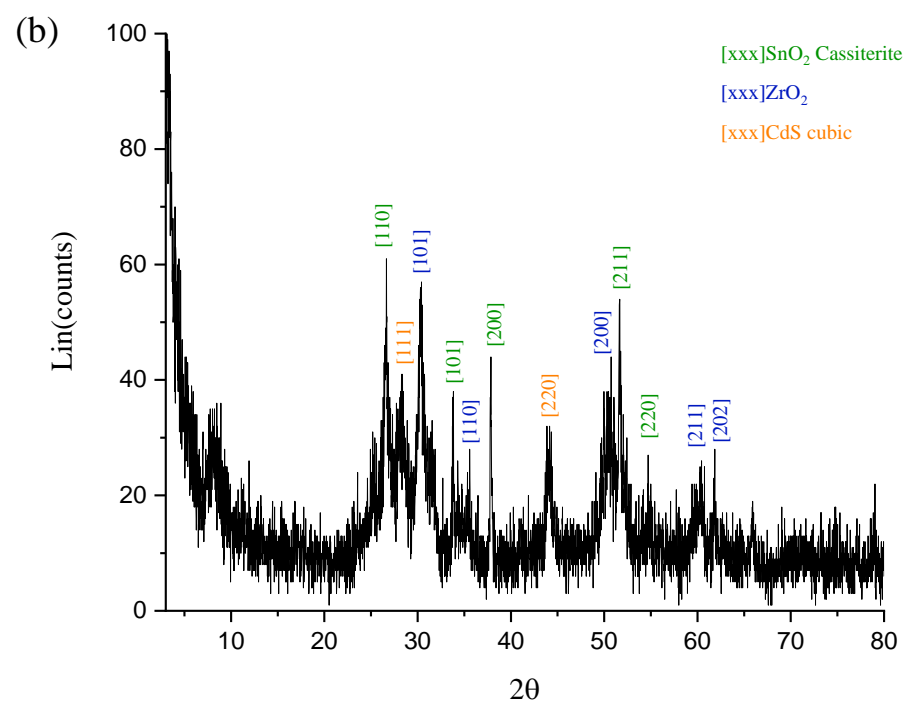

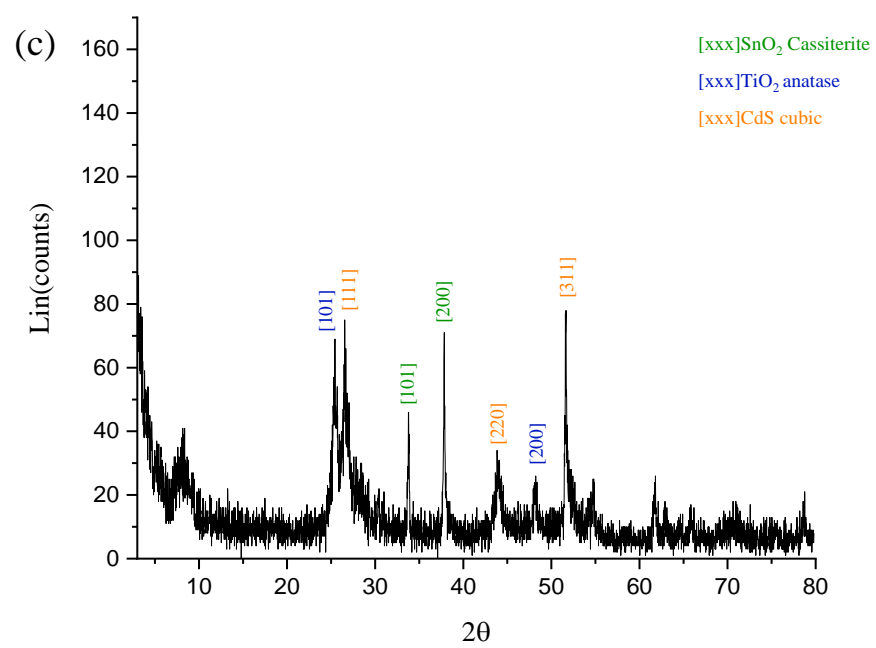

**Figure S3.** XRD patterns of (a) FTO/CdS, (b) FTO/ZrO<sub>2</sub>/CdS (c) FTO/TiO<sub>2</sub>/CdS

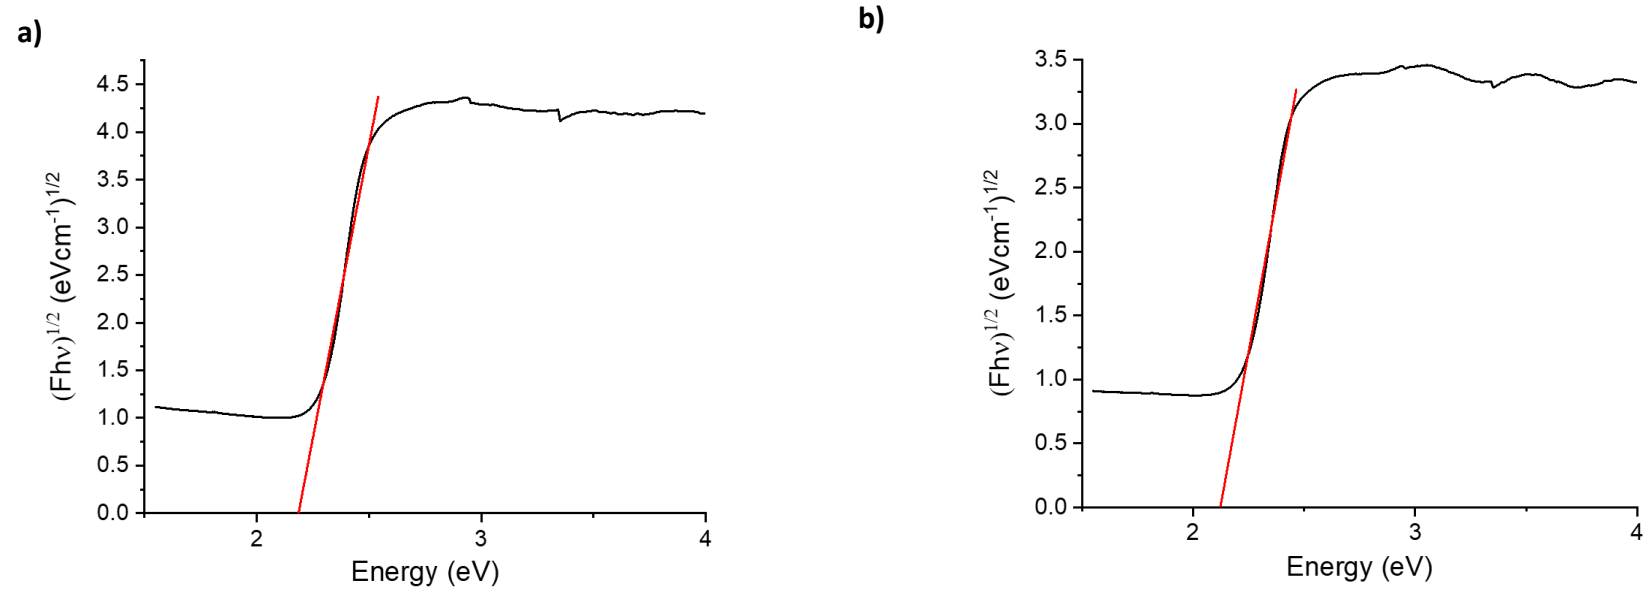

**Figure S4.** Tauc Plots of (a) FTO/ZrO<sub>2</sub>/CdS and (b) FTO/TiO<sub>2</sub>/CdS

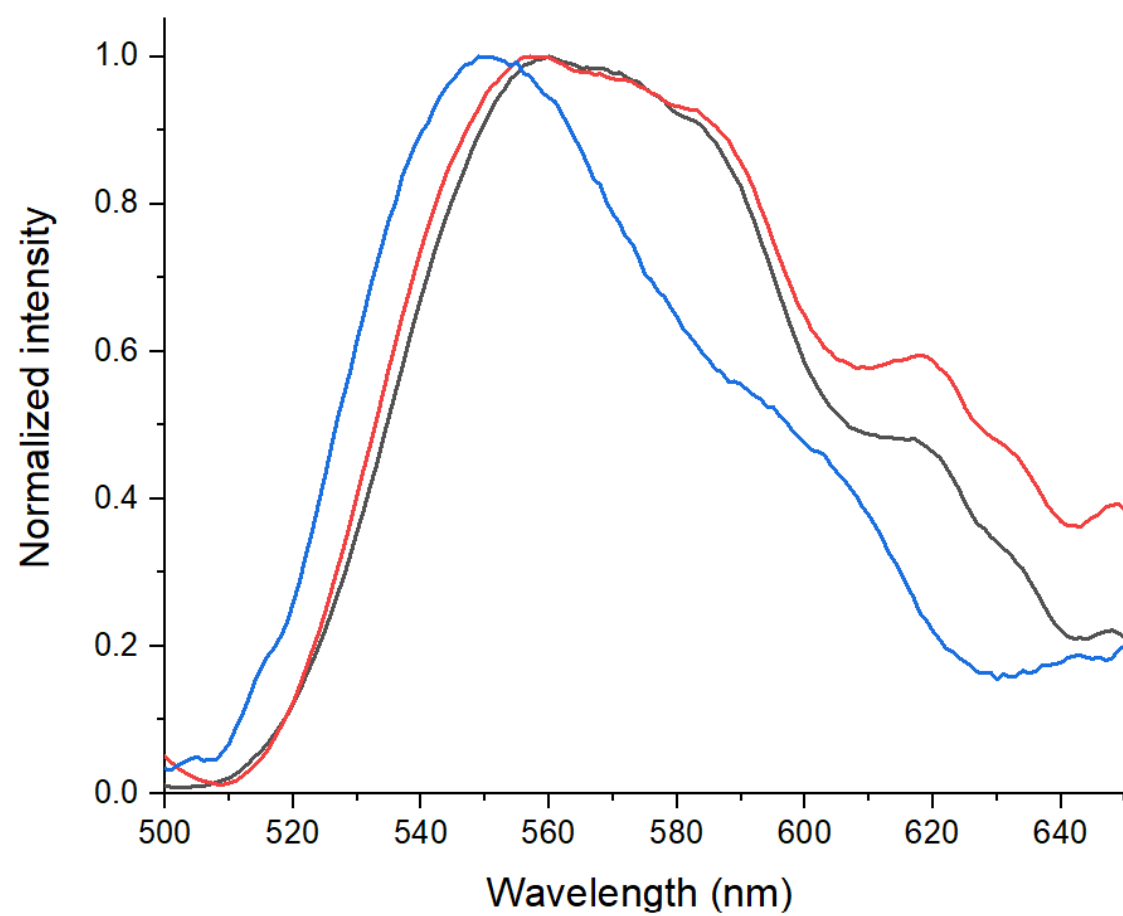

**Figure S5.** Emission spectra ( $\lambda_{\text{exc}} = 450$  nm) of FTO/CdS, FTO/ZrO<sub>2</sub>/CdS, FTO/TiO<sub>2</sub>/CdS thin films at room temperature.

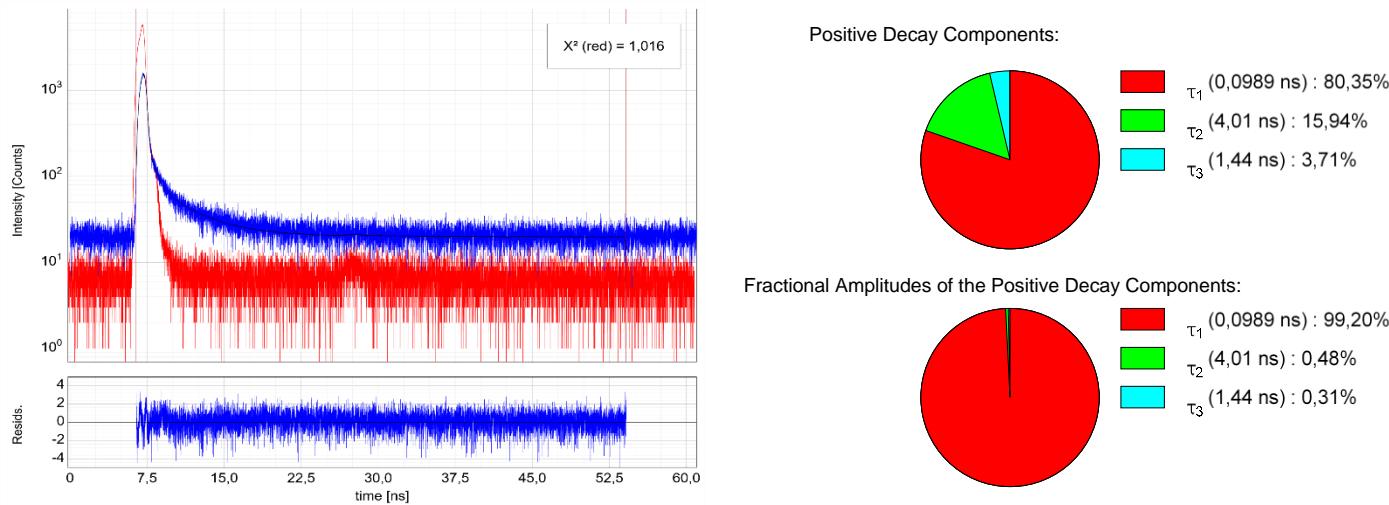

| Parameter                   | Value  | Conf. Lower | Conf. Upper | Conf. Estimation |
|-----------------------------|--------|-------------|-------------|------------------|
| $A_1$ [Cnts]                | 2312   | -50         | +50         | Fitting          |
| $\tau_1$ [ns]               | 0,0989 | -0,0021     | +0,0021     | Fitting          |
| $A_2$ [Cnts]                | 11,30  | -0,96       | +0,96       | Fitting          |
| $\tau_2$ [ns]               | 4,01   | -0,31       | +0,31       | Fitting          |
| $A_3$ [Cnts]                | 7,3    | -2,3        | +2,3        | Fitting          |
| $\tau_3$ [ns]               | 1,44   | -0,47       | +0,47       | Fitting          |
| Bkgr. <sub>Dec</sub> [Cnts] | -6,83  | -0,81       | +0,81       | Fitting          |
| Bkgr. <sub>IRF</sub> [Cnts] | -67,3  | -2,2        | +2,2        | Fitting          |
| Shift <sub>IRF</sub> [ns]   | -0,209 | -0,010      | +0,010      | Fitting          |
| $A_{Scat}$ [Cnts]           | -57900 | -7200       | +7200       | Fitting          |
| Period <sub>Rep</sub> [ns]  | 0,0587 | -0,0048     | +0,0048     | Fitting          |

**Figure S6.** Single photon timing emission decay of FTO/ZrO<sub>2</sub>/CdS in 1M sodium formate



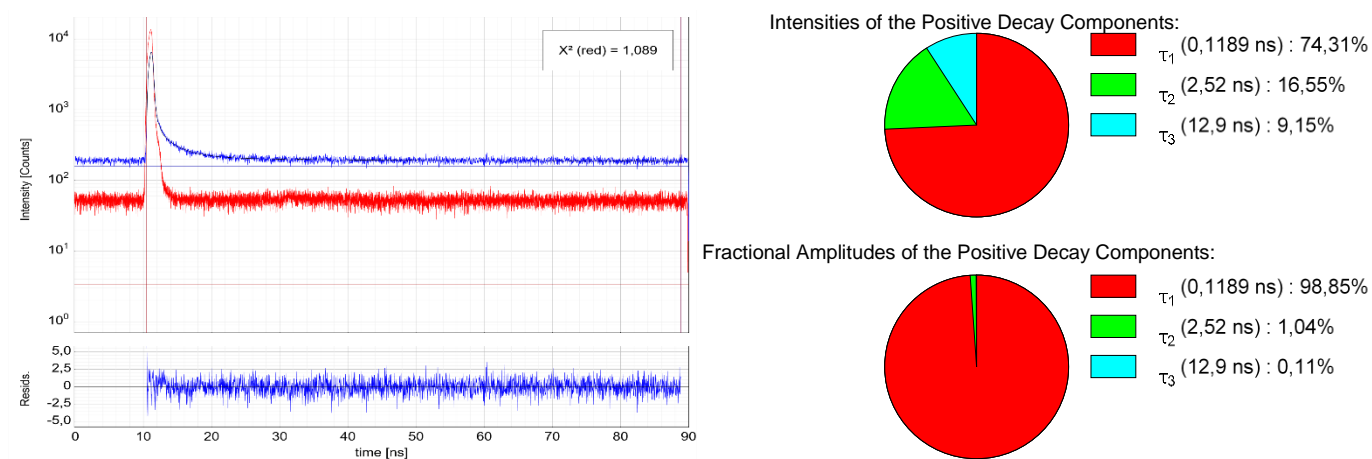

| Parameter                | Value    | Conf. Lower | Conf. Upper | Conf. Estimation |
|--------------------------|----------|-------------|-------------|------------------|
| A <sub>1</sub> [Cnts]    | 8150     | -190        | +190        | Fitting          |
| $\tau_1$ [ns]            | 0,1189   | -0,0027     | +0,0027     | Fitting          |
| A <sub>2</sub> [Cnts]    | 85,7     | -7,5        | +7,5        | Fitting          |
| $\tau_2$ [ns]            | 2,52     | -0,20       | +0,20       | Fitting          |
| A <sub>3</sub> [Cnts]    | 9,3      | -2,0        | +2,0        | Fitting          |
| $\tau_3$ [ns]            | 12,9     | -2,9        | +2,9        | Fitting          |
| Bkgr. Dec [Cnts]         | 158,9    | -2,4        | +2,4        | Fitting          |
| Bkgr. IRF [Cnts]         | 3,4      | -3,7        | +3,7        | Fitting          |
| Shift IRF [ns]           | -0,1421  | -0,0077     | +0,0077     | Fitting          |
| A <sub>Scat</sub> [Cnts] | 145000   | -37000      | +37000      | Fitting          |
| Period Rep [ns]          | -0,00026 | -0,0071     | +0,0071     | Fitting          |

**Figure S7.** Single photon timing emission decay of FTO/TiO<sub>2</sub>/CdS in 1M sodium formate

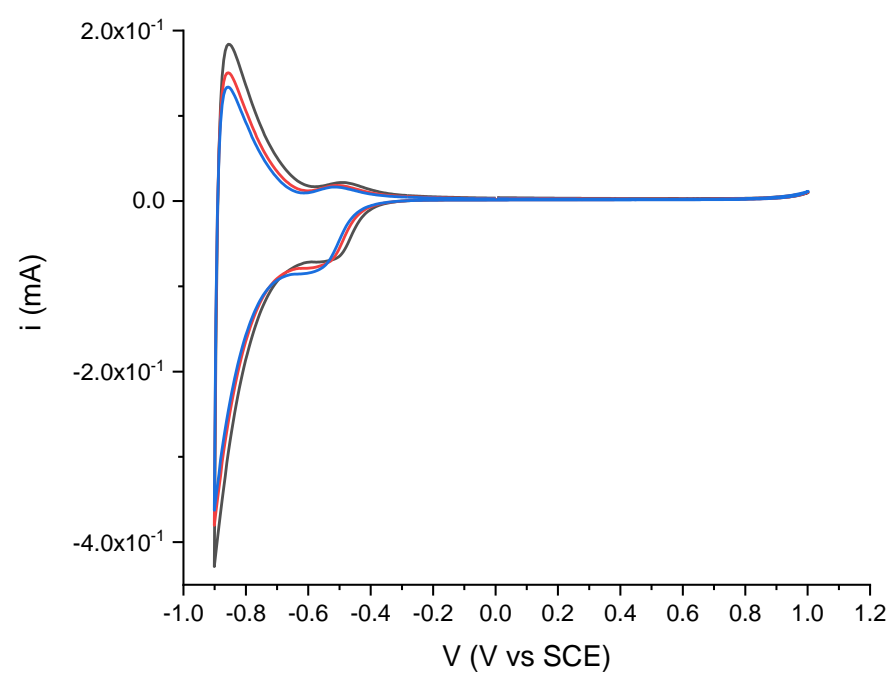

**Figure S8.** Dark cyclic voltammetry of the FTO/TiO<sub>2</sub>/CdS recorded in HCOONa 1M at pH 7 between -1V/1V vs SCE at a scan rate of 50mV/s

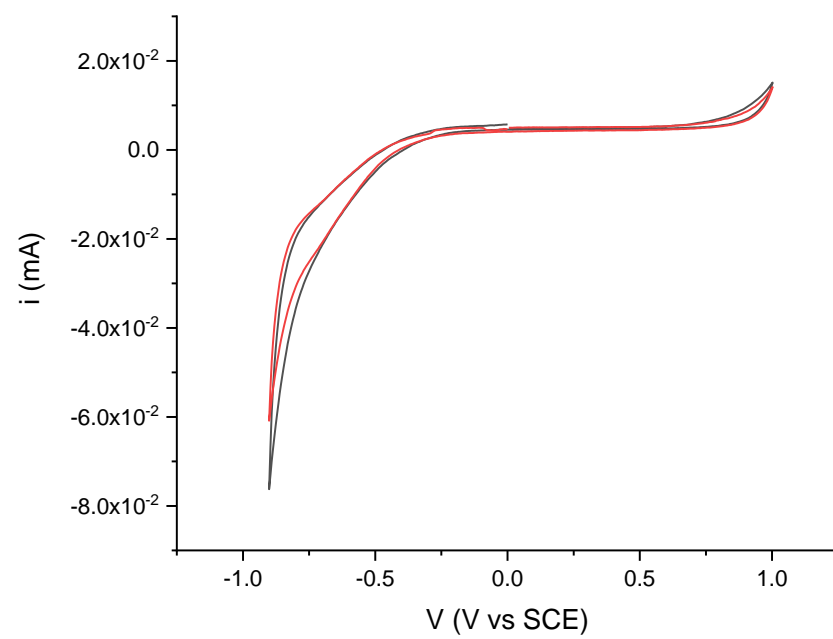

**Figure S9.** Dark cyclic voltammetry of the FTO/CdS recorded in HCOONa 1M at pH 7 between -1V/1V vs SCE at a scan rate of 50mV/s

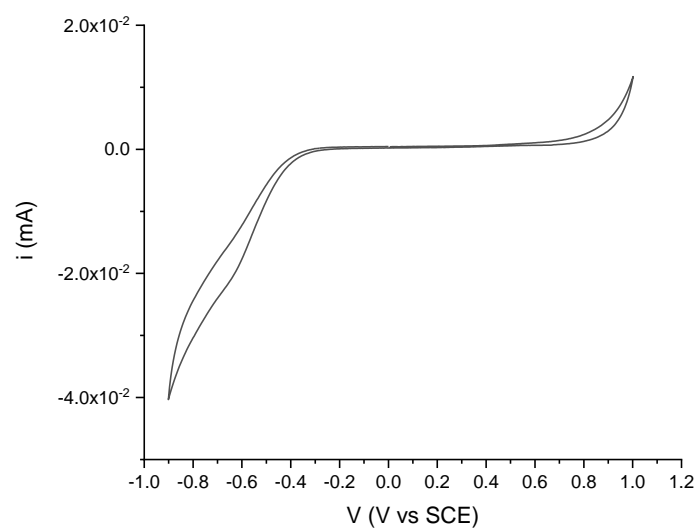

**Figure S10.** Dark cyclic voltammetry of the FTO/ZrO<sub>2</sub>/CdS recorded in HCOONa 1M at pH 7 between -1V/1V vs SCE at a scan rate of 50mV/s

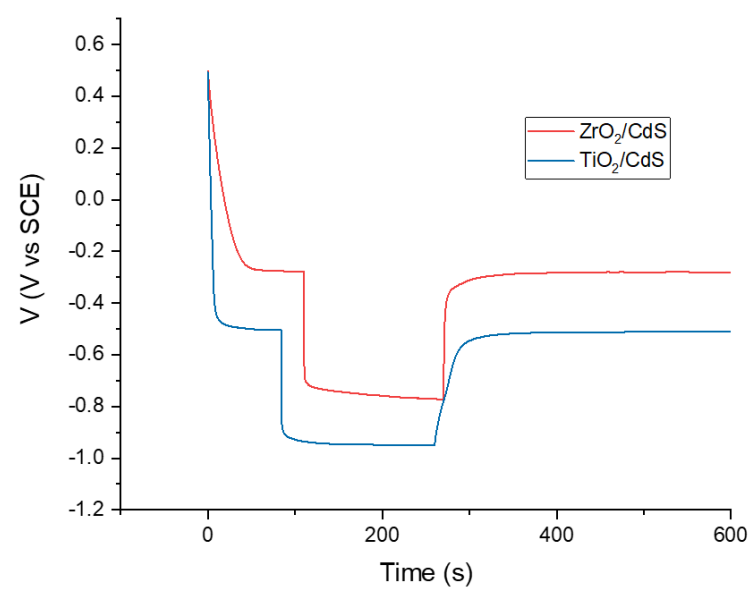

**Figure S11.** Open circuit chronopotentiometry of FTO/ZrO<sub>2</sub>/CdS (red) and FTO/TiO<sub>2</sub>/CdS (blue) in the presence of 1 M HCOONa at pH 7.

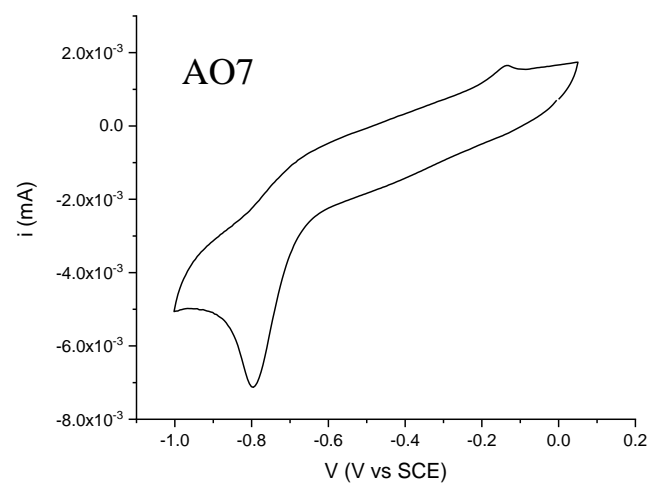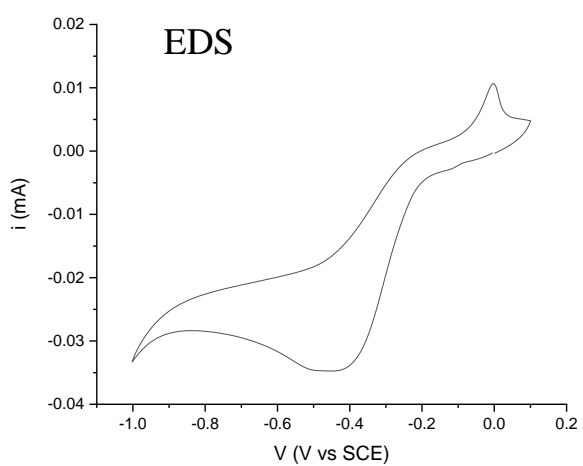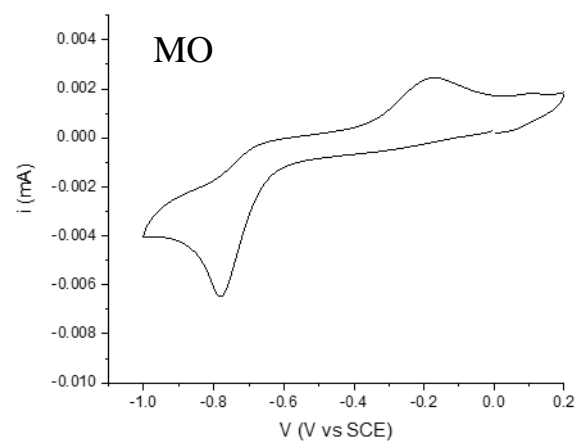

**Figure S12.** Cyclic voltammetry of the MO, AO7 and EDS dyes (20 mV/s) recorded in the presence of 0.1 M LiClO<sub>4</sub> at a glassy carbon electrode.

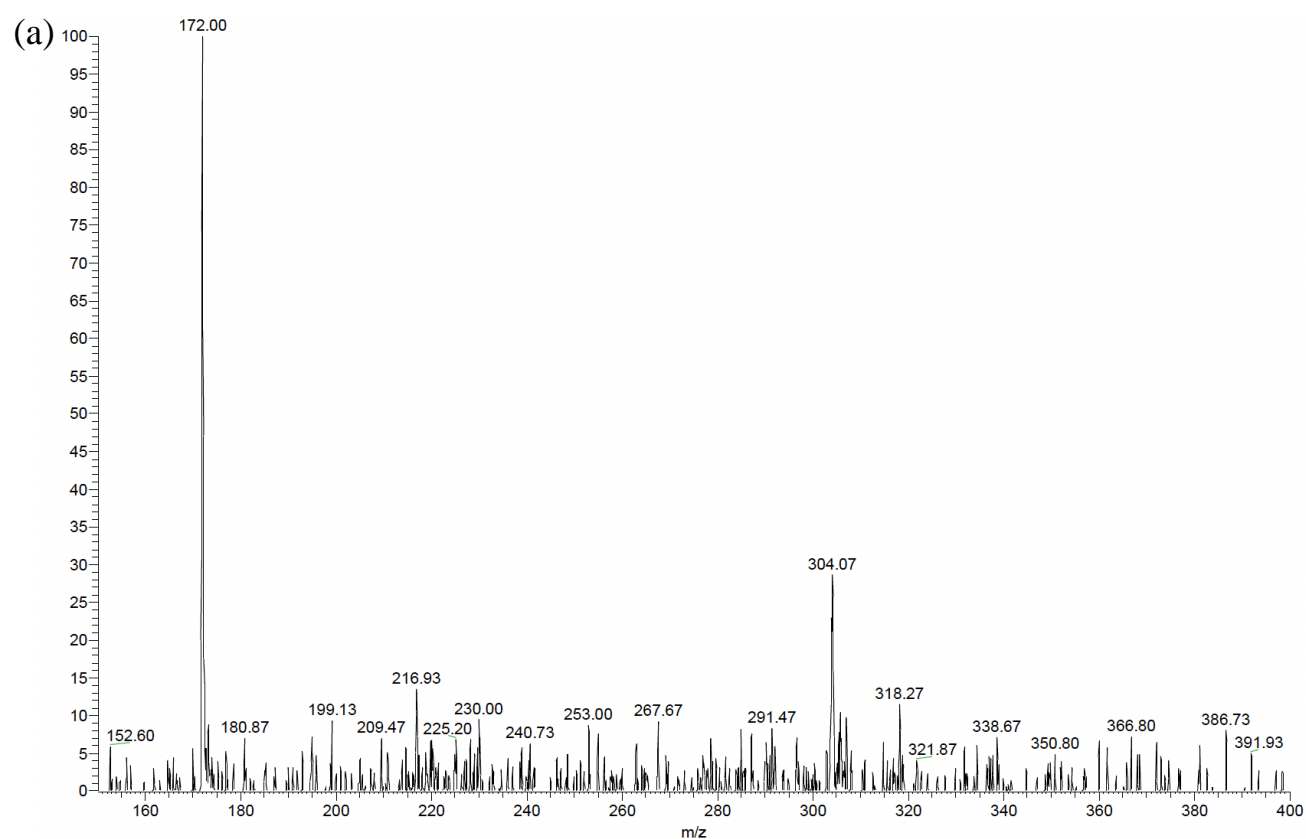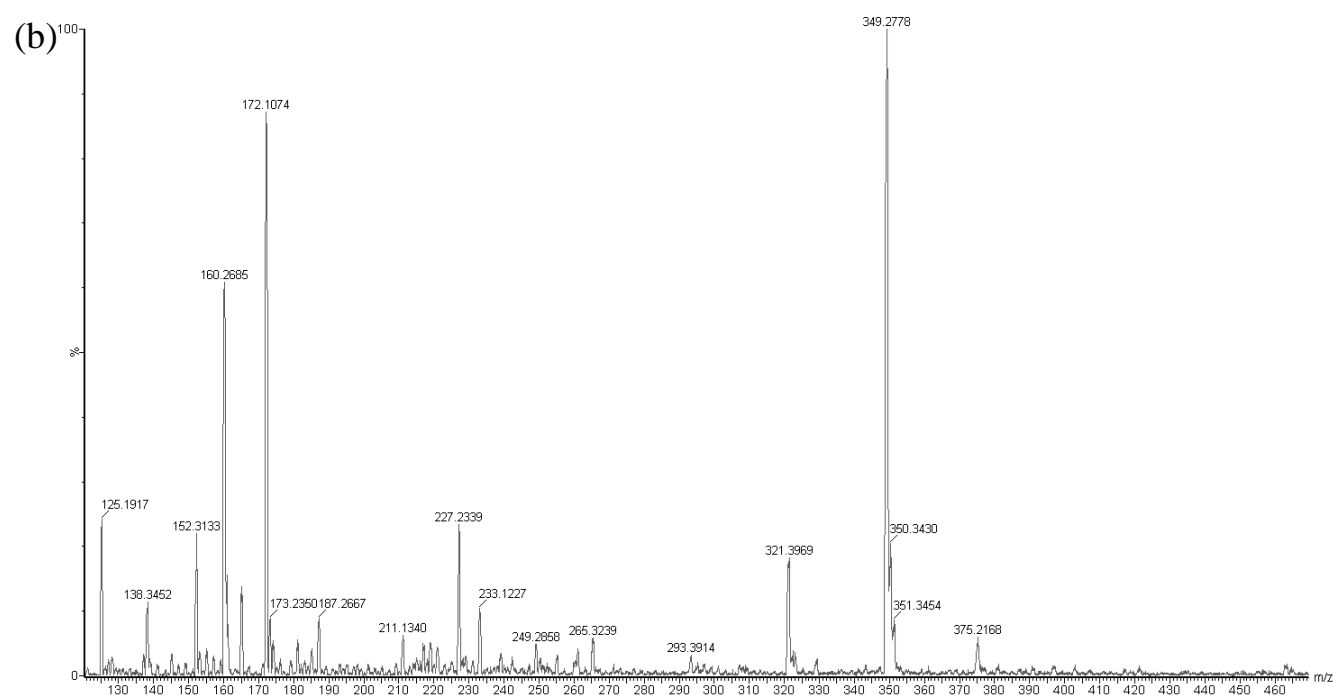

**Figure S13.** (a): ESI-MS spectrum of the deaerated aqueous solution containing MO (10 ppm) and ethanol (10% v/v) after irradiation ( $\lambda \geq 420$  nm) in the presence of FTO/TiO<sub>2</sub>/CdS system. (b) the same as part a but with EDS (10 ppm). Ethanol is used here in place of formate as a nonionic hole scavenger.

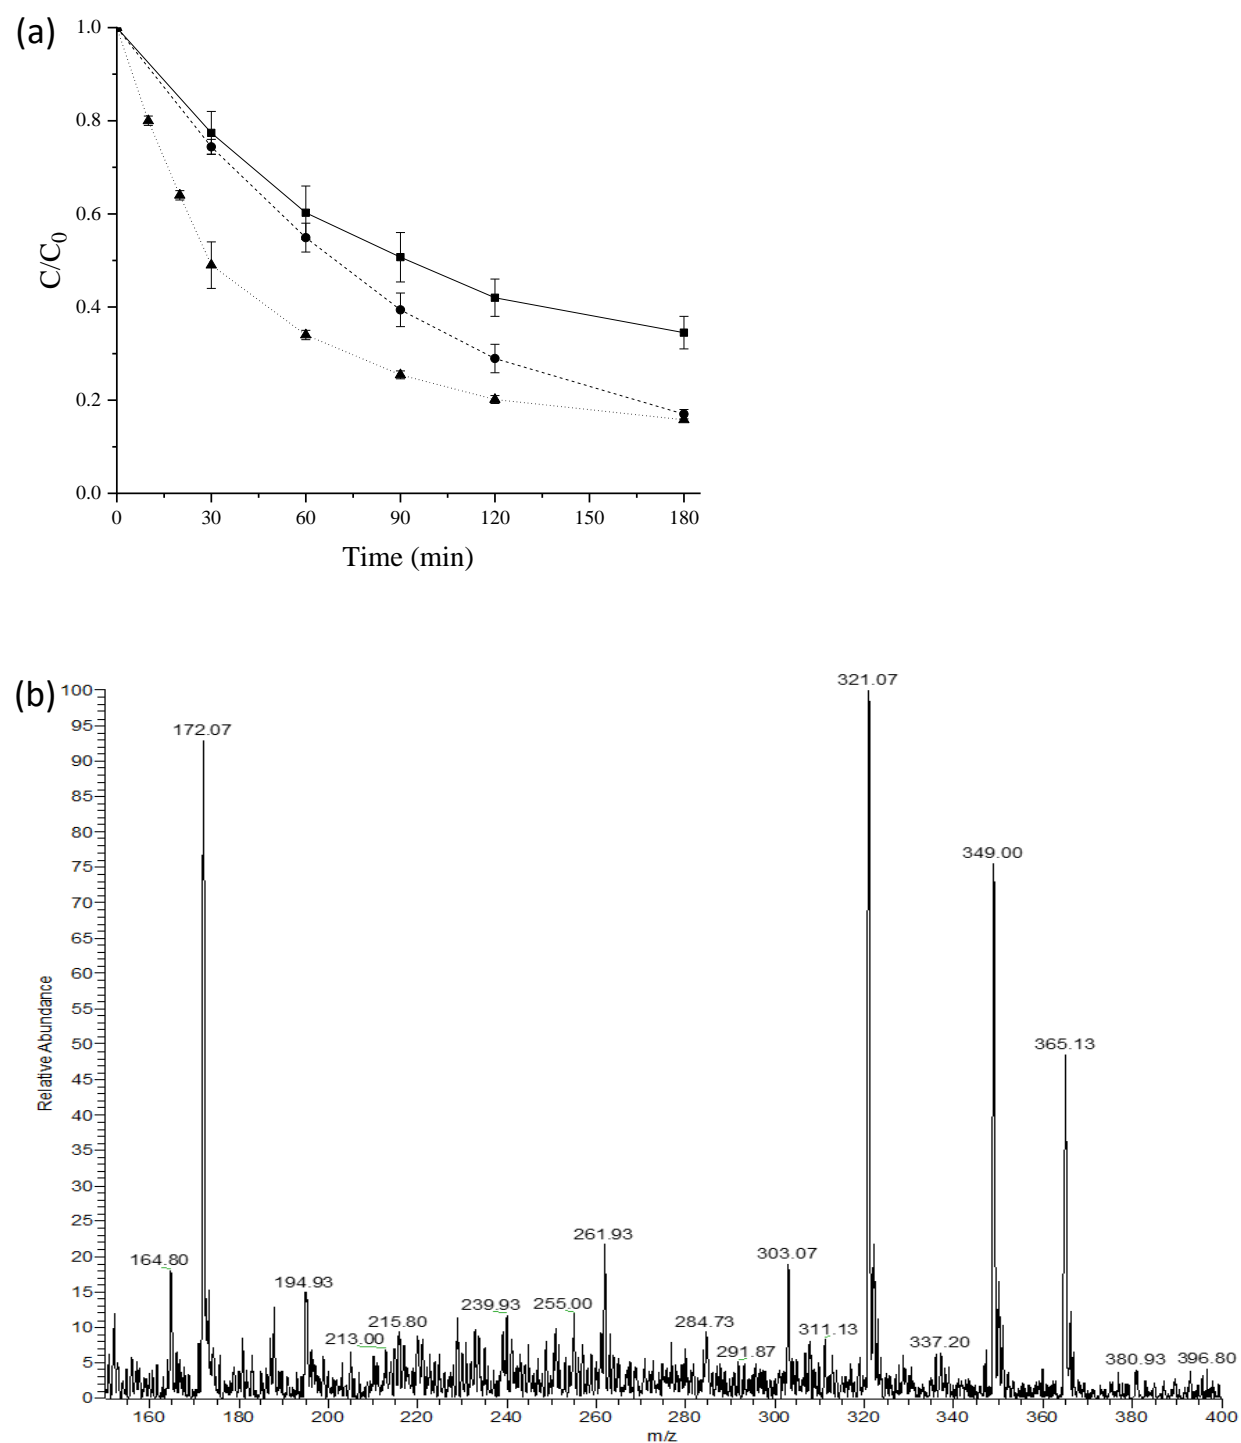

**Figure S14.** (a)  $C/C_0$  ratio vs. time profiles obtained upon irradiation ( $\lambda \geq 420$  nm) of FTO/ $\text{ZrO}_2$ /CdS film immersed in deaerated aqueous solutions containing  $\text{HCOONa}$  (1 M) and MO (circle), or AO7 (triangle), or EDS (square).  $C_0 = 10$  ppm. Reported data are the mean of three repeated experiments. (b) ESI-MS spectrum of deaerated aqueous solution containing EDS (10 ppm) and ethanol (10% v/v) after irradiation ( $\lambda > 420$  nm) in the presence of FTO/ $\text{ZrO}_2$ /CdS system



**Table S1.** Kinetic constants and half-time values determined by dyes concentration decrease under visible light irradiation with FTO/MO<sub>2</sub>/CdS systems.

|                                | <i>Dye</i> | <i>k (min<sup>-1</sup>)</i> | <i>t</i> <sub>1/2</sub> | <i>R</i> <sup>2</sup> |
|--------------------------------|------------|-----------------------------|-------------------------|-----------------------|
| <i>FTO/TiO<sub>2</sub>/CdS</i> | MO         | 0.0125                      | 55                      | 0.9977                |
|                                | AO7        | 0.0283                      | 24                      | 0.9726                |
|                                | EDS        | 0.0123                      | 56                      | 0.9004                |
| <i>FTO/ZrO<sub>2</sub>/CdS</i> | MO         | 0.0104                      | 66                      | 0.9933                |
|                                | AO7        | 0.0178                      | 39                      | 0.9407                |
|                                | EDS        | 0.0072                      | 96                      | 0.9711                |
